# Supplementary material for: Surface-modified Pt1Ni1–Ni(OH)2nanoparticles with abundant Pt–Ni(OH)2interfaces enhance electrocatalytic properties
Source: Royal Society of Chemistry journal article supplement (doi:10.1039/c9dt01536a), 2019-01-01
Supplement: c9dt01536a1.pdf [file c9dt01536a1.pdf]

# Surface-modified Pt<sub>1</sub>Ni<sub>1</sub>-Ni(OH)<sub>2</sub> Nanoparticles with Abundant Pt-Ni(OH)<sub>2</sub> Interfaces Enhance Electrocatalytic Properties

Yuchen Qin <sup>a,b\*</sup>, Hongying Zhuo <sup>b</sup>, Xiaoyu Liang <sup>a</sup>, Kuomiao Yu <sup>b</sup>, Yao Wang <sup>b</sup>, Daowei Gao <sup>c\*</sup>, Xin Zhang <sup>b\*</sup>

<sup>a</sup> College of Science, Henan Agricultural University, Zhengzhou 450000, China.

<sup>b</sup> State Key Laboratory of Heavy Oil Processing, College of Chemical Engineering, China University of Petroleum, Beijing 102249, China.

<sup>c</sup> School of Chemistry and Chemical Engineering, University of Jinan, Jinan 250022, China.

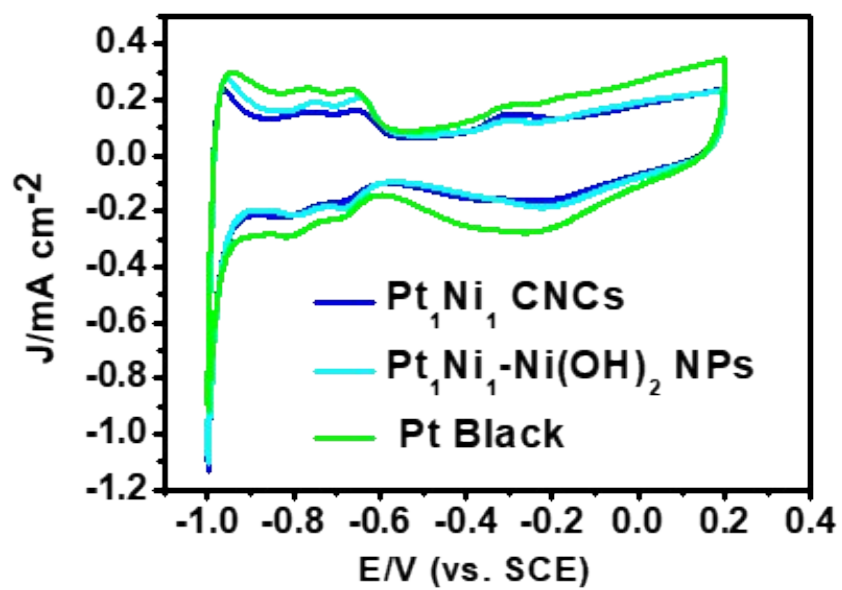

Fig. S1. CV curves of the  $\text{Pt}_1\text{Ni}_1$  CNCs and  $\text{Pt}_1\text{Ni}_1\text{-Ni(OH)}_2$  NPs and Pt Black in a  $\text{N}_2$ -Purged 0.1M NaOH solution at a scan rate of  $50 \text{ mV s}^{-1}$ .

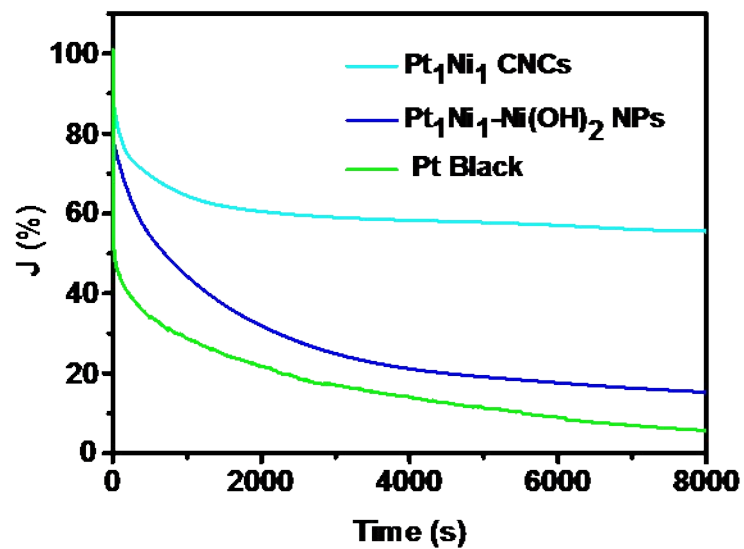

Fig. S2. I-t curves at 0.6 V vs. RHE for methanol electrooxidation in a mixture of 0.1 M NaOH and 1 M CH<sub>3</sub>OH of as-prepared Pt<sub>1</sub>Ni<sub>1</sub> CNCs, Pt<sub>1</sub>Ni<sub>1</sub>-Ni(OH)<sub>2</sub> NPs and commercial Pt Black.

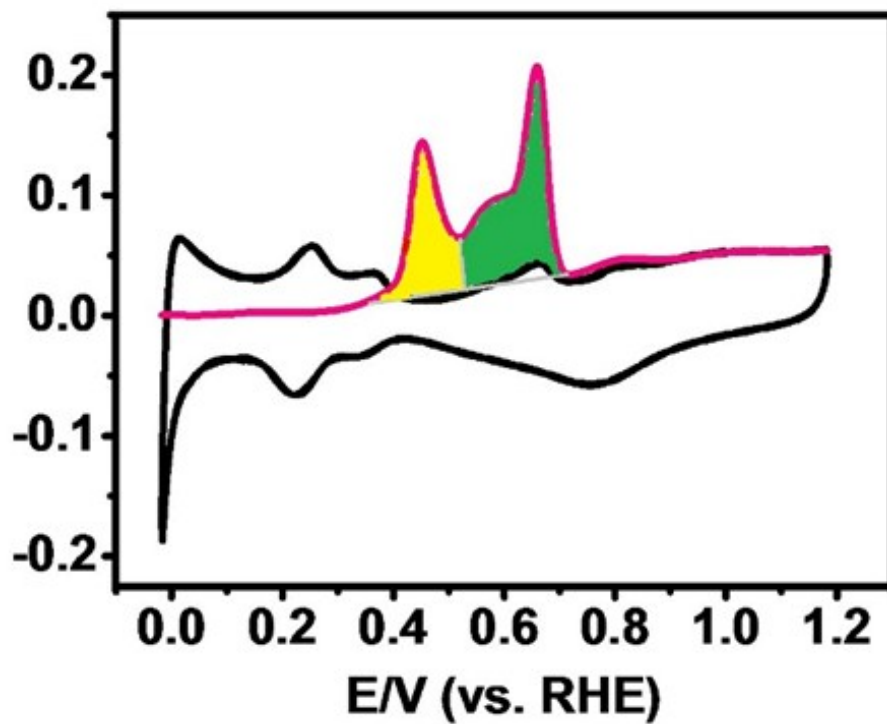

Fig. S3. The integration of CO oxidation peak areas of Pt<sub>1</sub>Ni<sub>1</sub>-Ni(OH)<sub>2</sub> NPs.

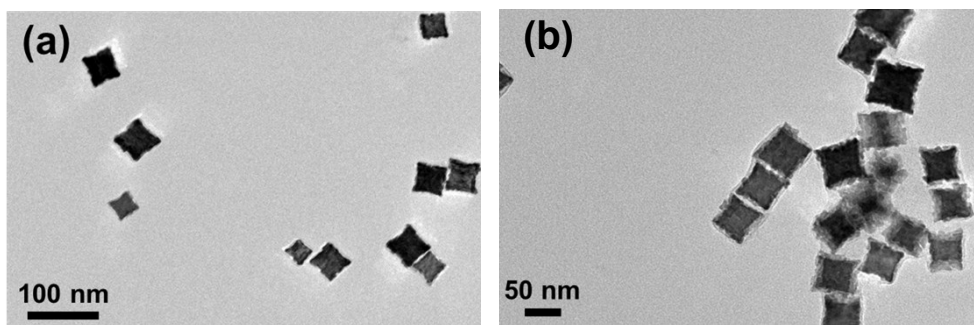

Fig. S4. Representative TEM images of (a) Pt<sub>3</sub>Ni CNCs and (b) Pt<sub>3</sub>Ni-Ni(OH)<sub>2</sub> NPs.

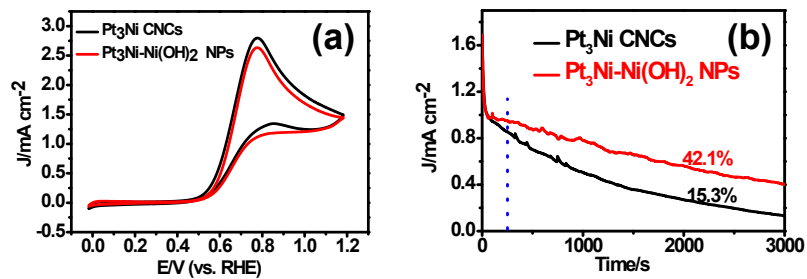

Fig. S5. (a) Cyclic voltammograms and (b) i-t curves (at 0.6 V vs. RHE) of as-prepared Pt<sub>3</sub>Ni CNCs and Pt<sub>3</sub>Ni-Ni(OH)<sub>2</sub> CNCs of methanol electrooxidation in a mixture of 0.1 M NaOH and 1 M CH<sub>3</sub>OH at a scan rate of 50 mV s<sup>-1</sup>.

Table S1. The components of as-prepared catalysis measured by ICP-OES

| Samples                                                  | Pt/Ni molar ratio |
|----------------------------------------------------------|-------------------|
| Pt <sub>1</sub> Ni <sub>1</sub> -Ni(OH) <sub>2</sub> NPs | 62.7/37.3         |
| Pt <sub>3</sub> Ni-Ni(OH) <sub>2</sub> NPs               | 81.4/18.6         |

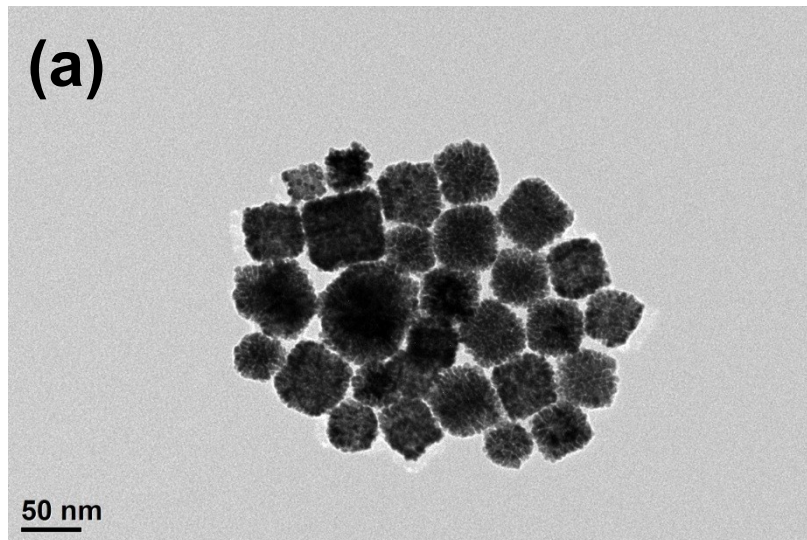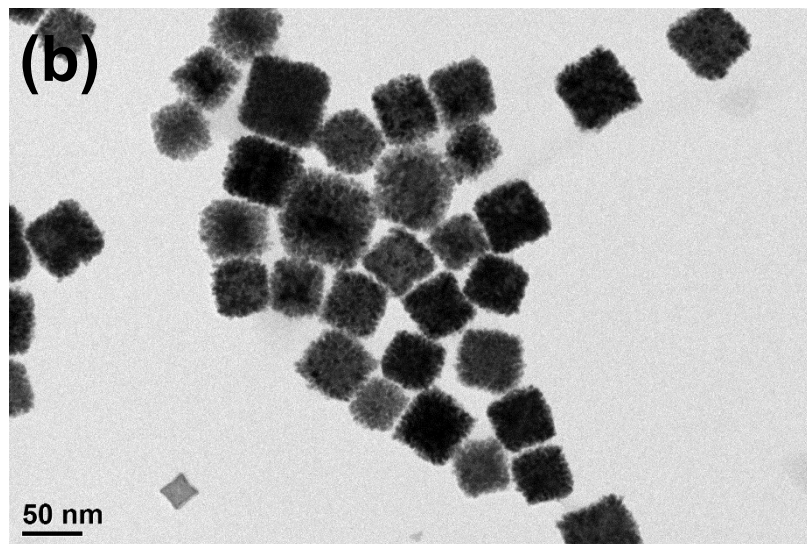

Fig. S6. (a) and (b) TEM images of PtNi<sub>3</sub> NPs.
